# Supplementary material for: Dissection of Hyperspectral Reflectance to Estimate Photosynthetic Characteristics in Upland Cotton (Gossypium hirsutum L.) under Different Nitrogen Fertilizer Application Based on Machine Learning Algorithms
Source: MDPI journal article supplement (doi:10.3390/plants12030455), 2023-01-19
Supplement: s1 [file s1]

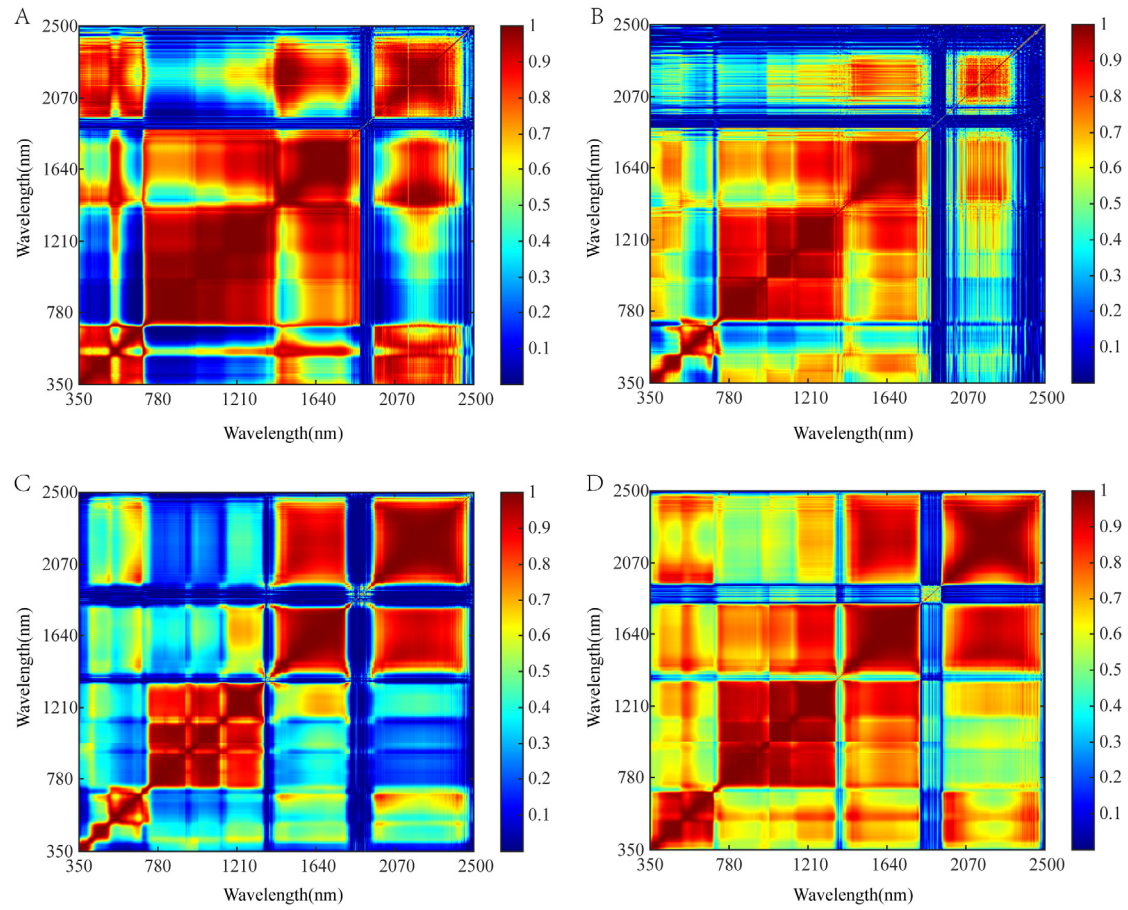

**Figure S1.** Autocorrelation of spectral reflectance in different bands of cotton canopy at different growth-stages. Note: A is full flowering stage; B is flower and boll stage; C is full boll stage; D is early boll opening stage.

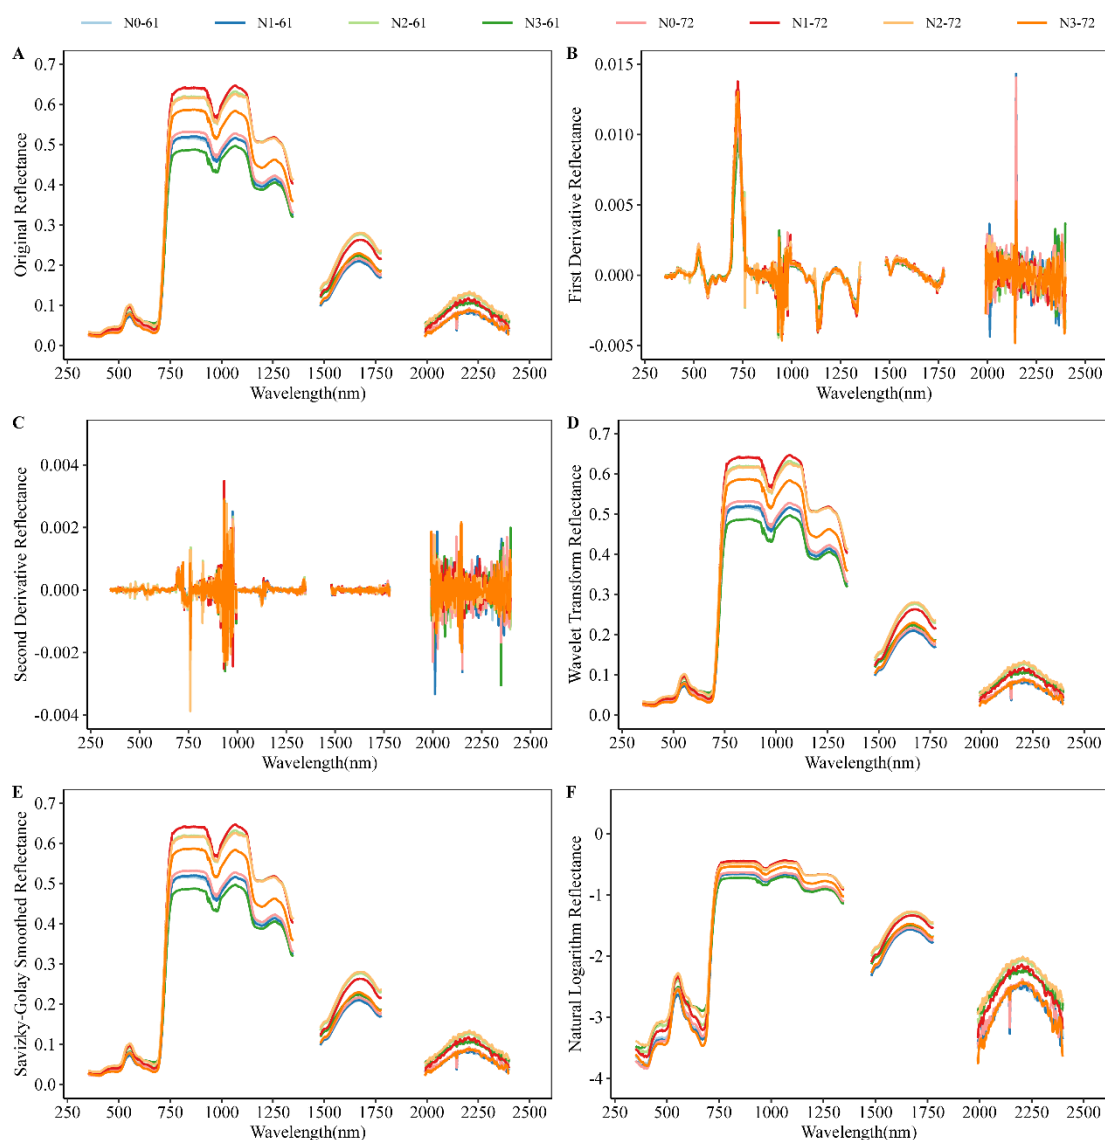

**Figure S2.** Original and preprocessed spectral data of two cotton varieties under different nitrogen treatments at full flowering stage in Test2019. Notes: The order of pictures is the same as in Figure 3.

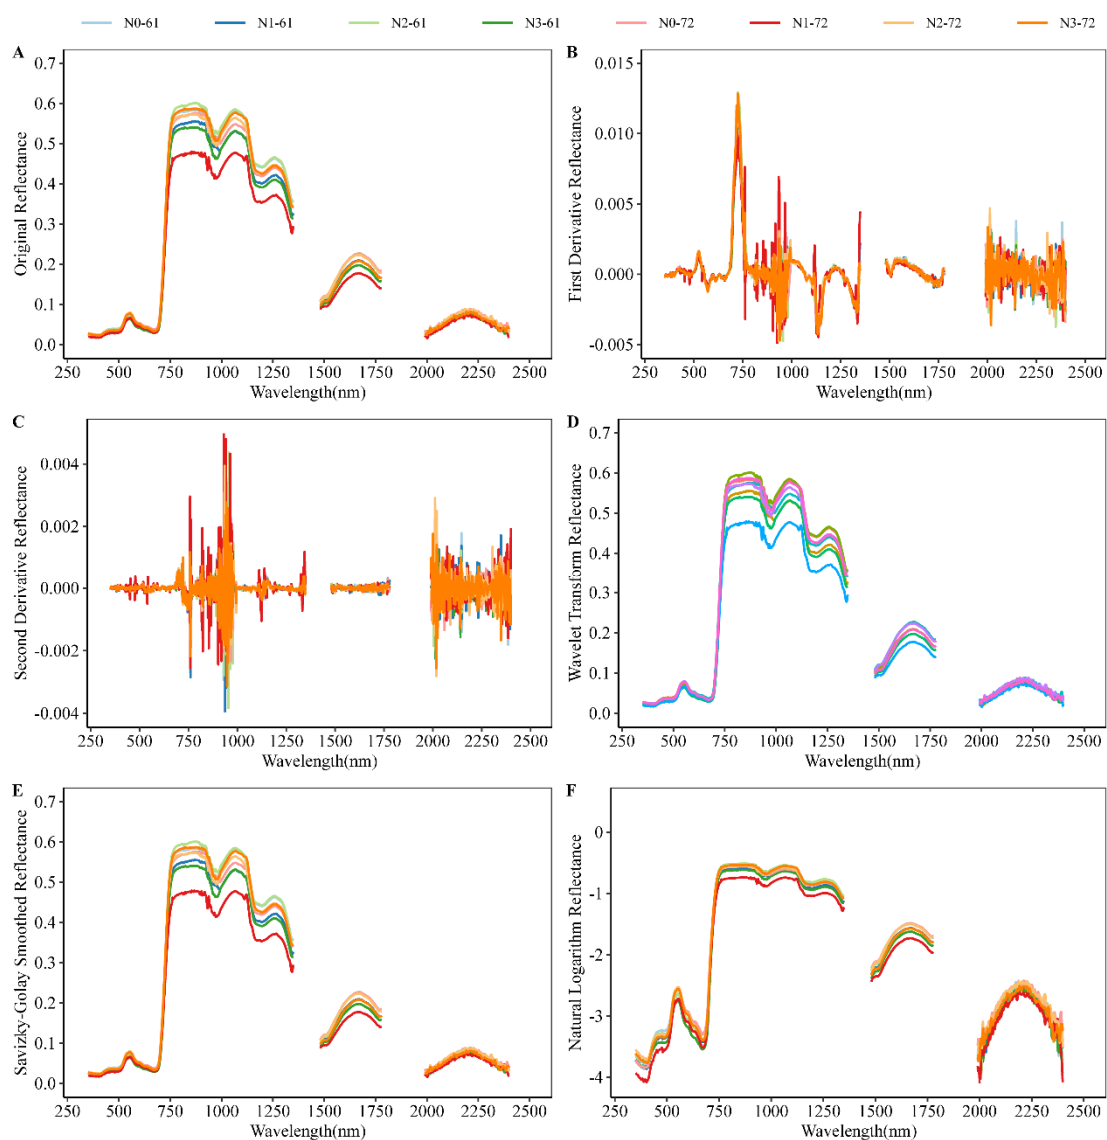

**Figure S3.** Original and preprocessed spectral data of two cotton varieties under different nitrogen treatments at flower and boll stage in Test2019. Notes: The order of pictures is the same as in Figure 3.

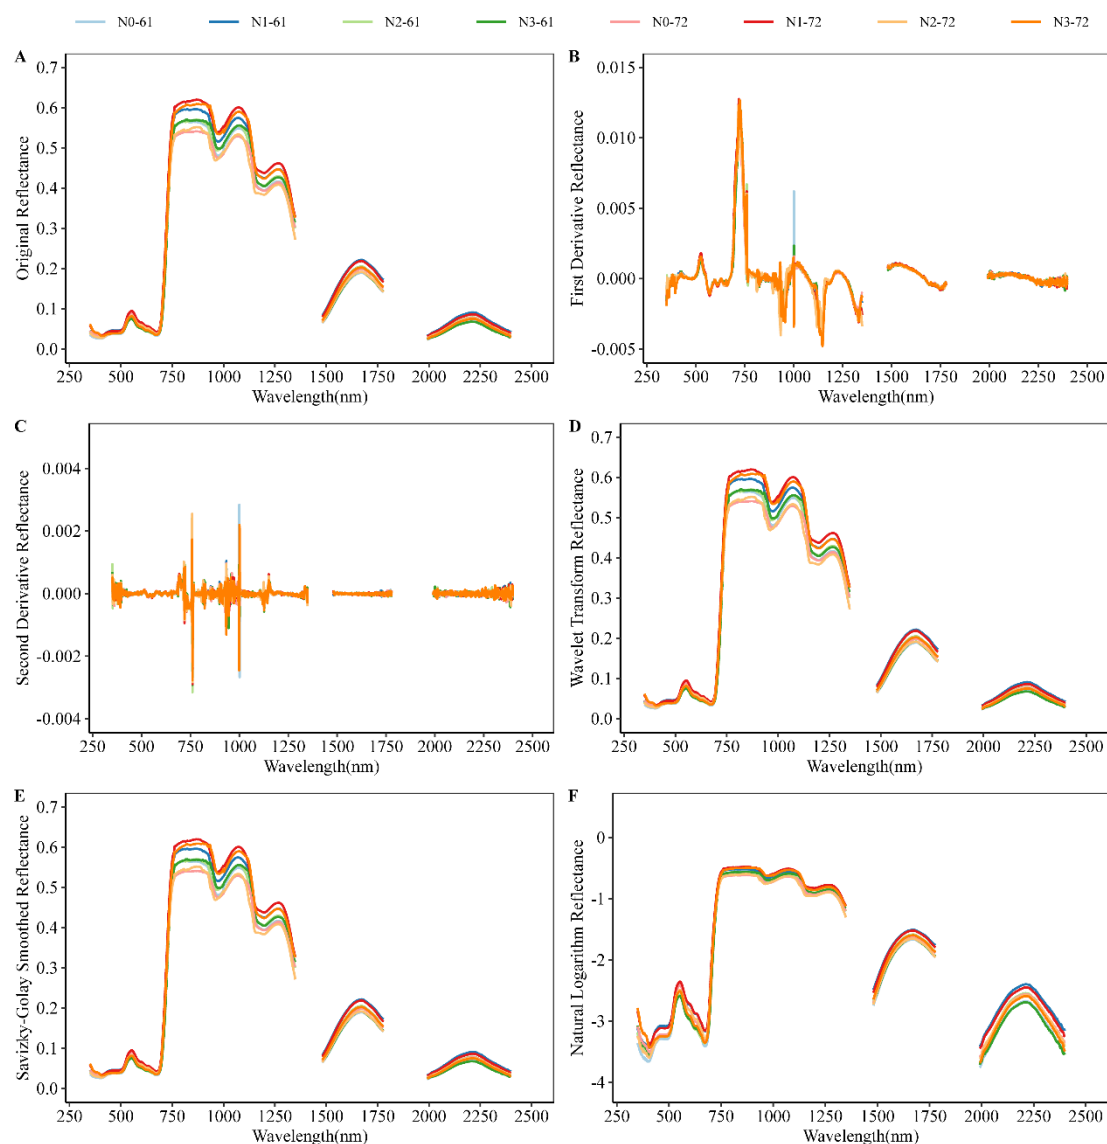

**Figure S4.** Original and preprocessed spectral data of two cotton varieties under different nitrogen treatments at full boll stage e in Test2019. Notes: The order of pictures is the same as in Figure 3.

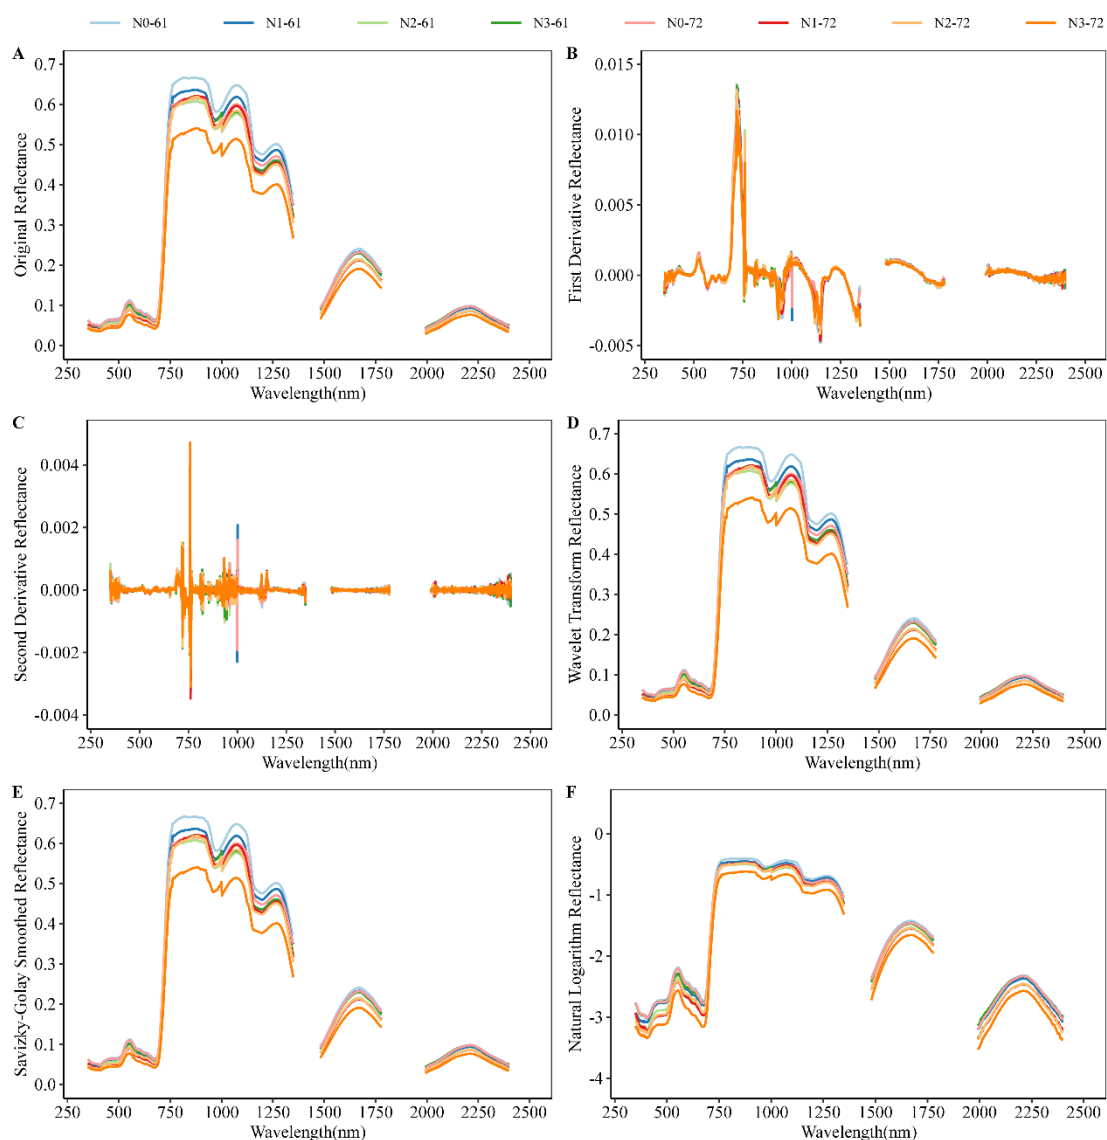

**Figure S5.** Original and preprocessed spectral data of two cotton varieties under different nitrogen treatments at early boll opening stage in Test2019. Notes: The order of pictures is the same as in Figure 3.

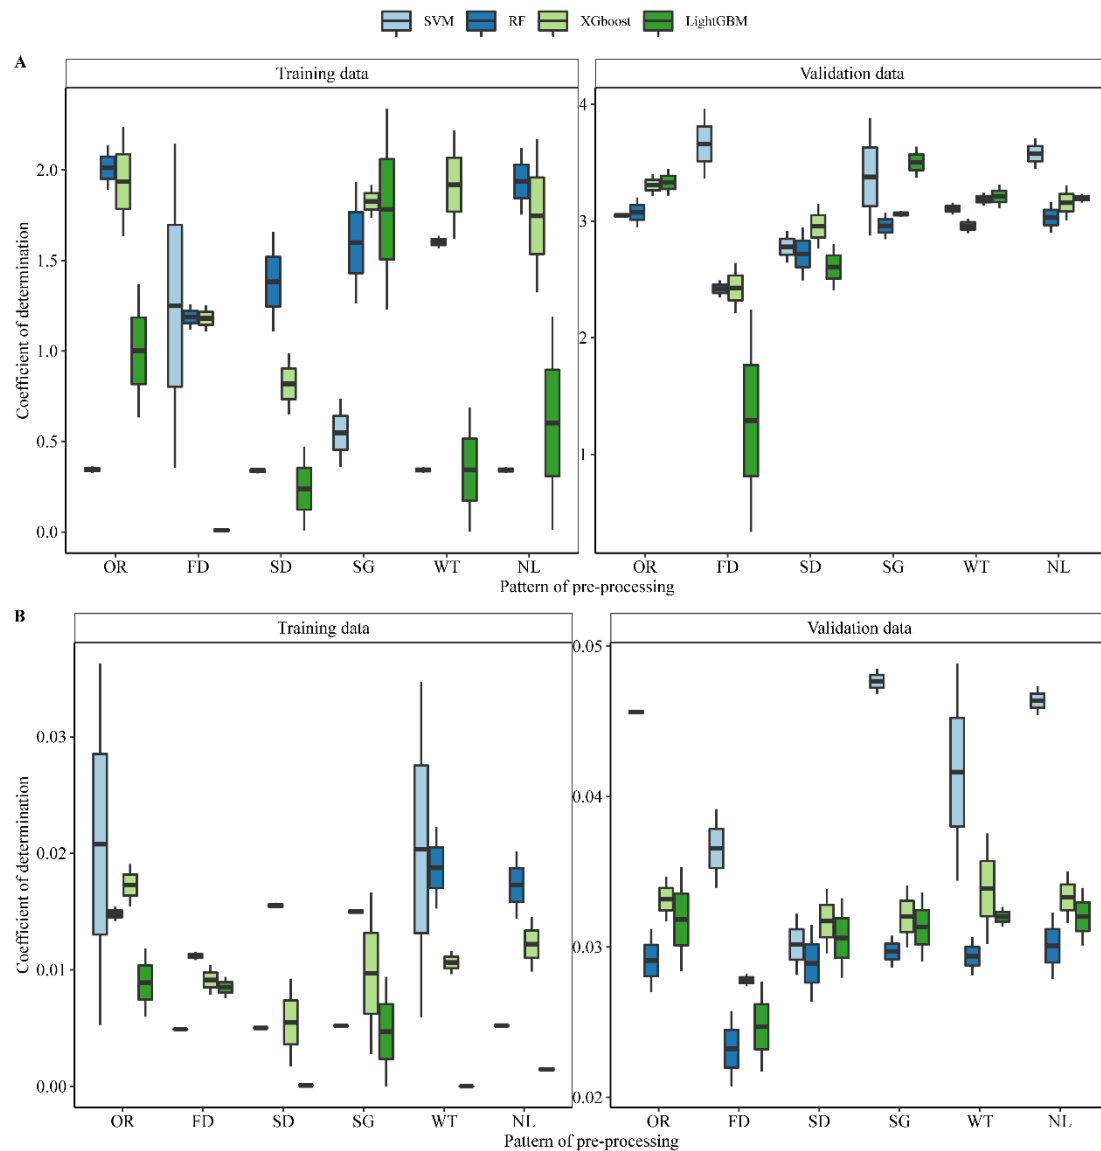

**Figure S6.** The coefficient of determination ( $R^2$ ) for each regression model and pre-processing of reflectance. Notes: A: The machine learning models for Pn. B: The machine learning models for FAPAR.

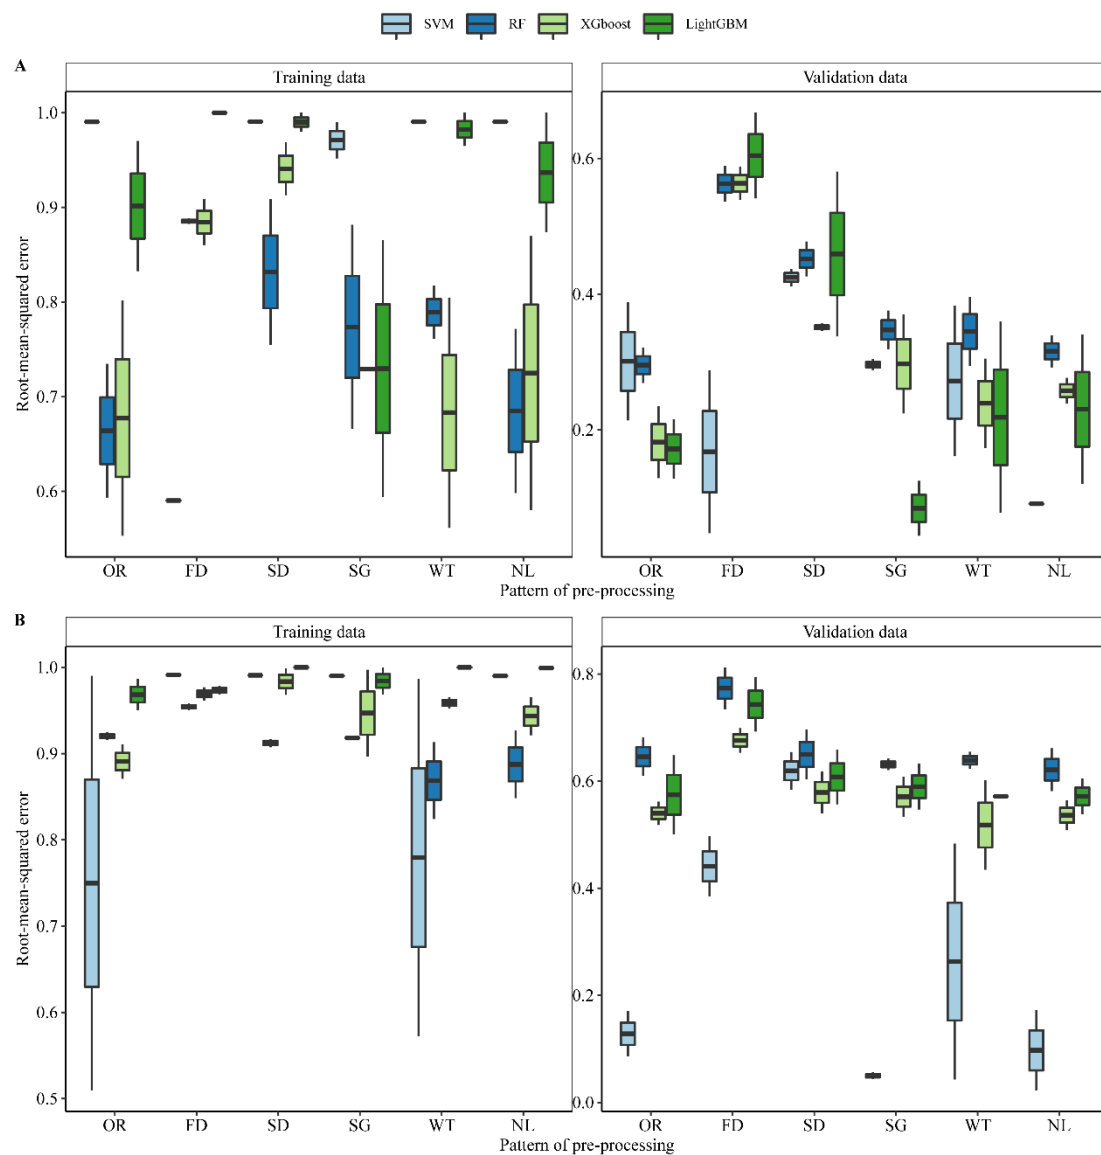

**Figure S7.** The root mean squared error (RMSE) for each regression model and pre-processing of reflectance. Notes: A: The machine learning models for Pn. B: The machine learning models for FAPAR.

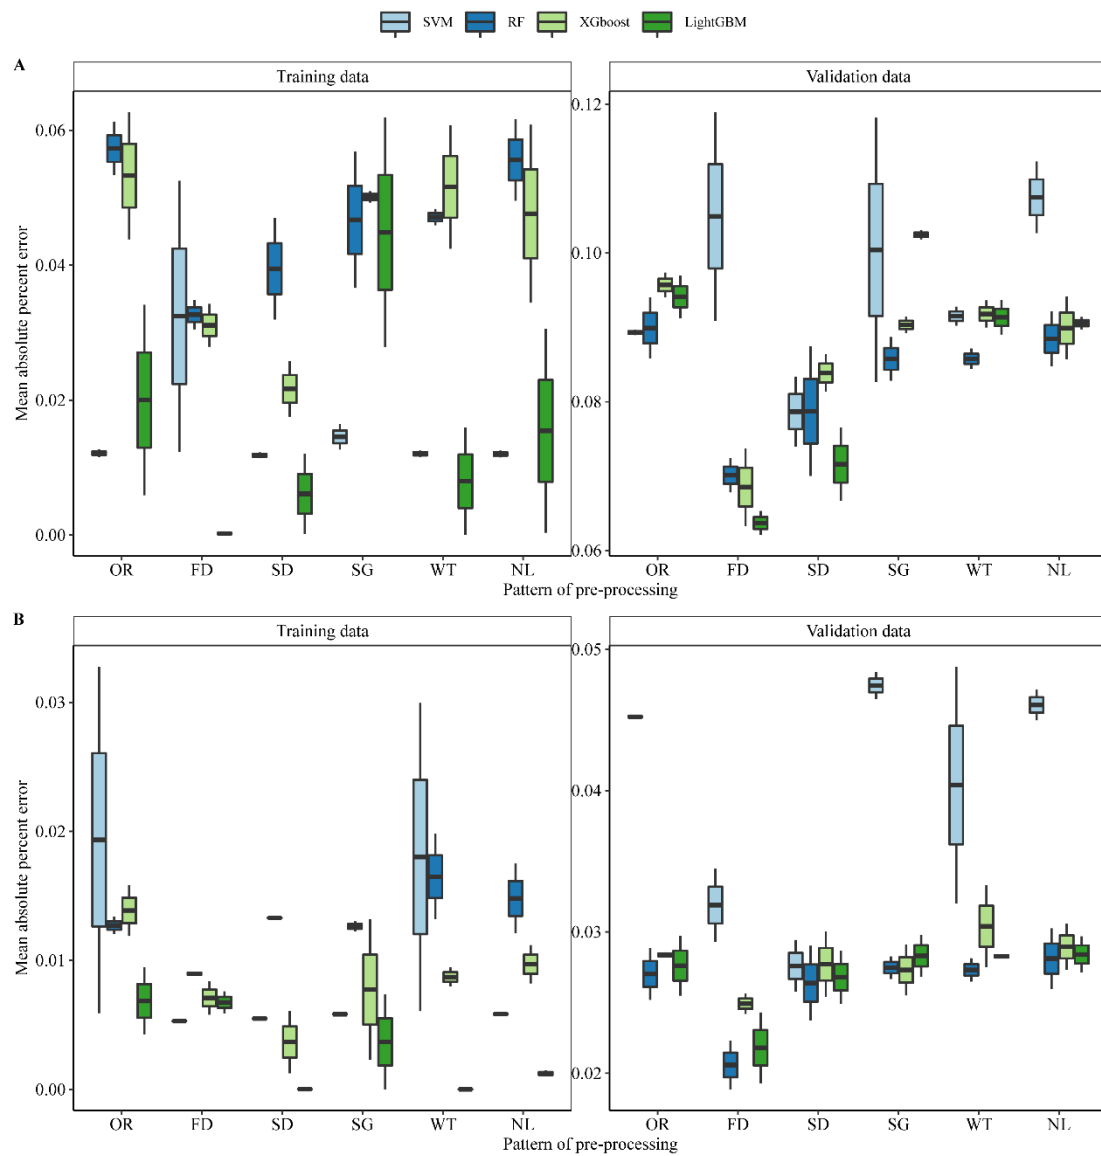

**Figure S8.** The mean absolute percent error (MAPE) for each regression model and pre-processing of reflectance. Notes: A: The machine learning models for Pn. B: The machine learning models for FAPAR.



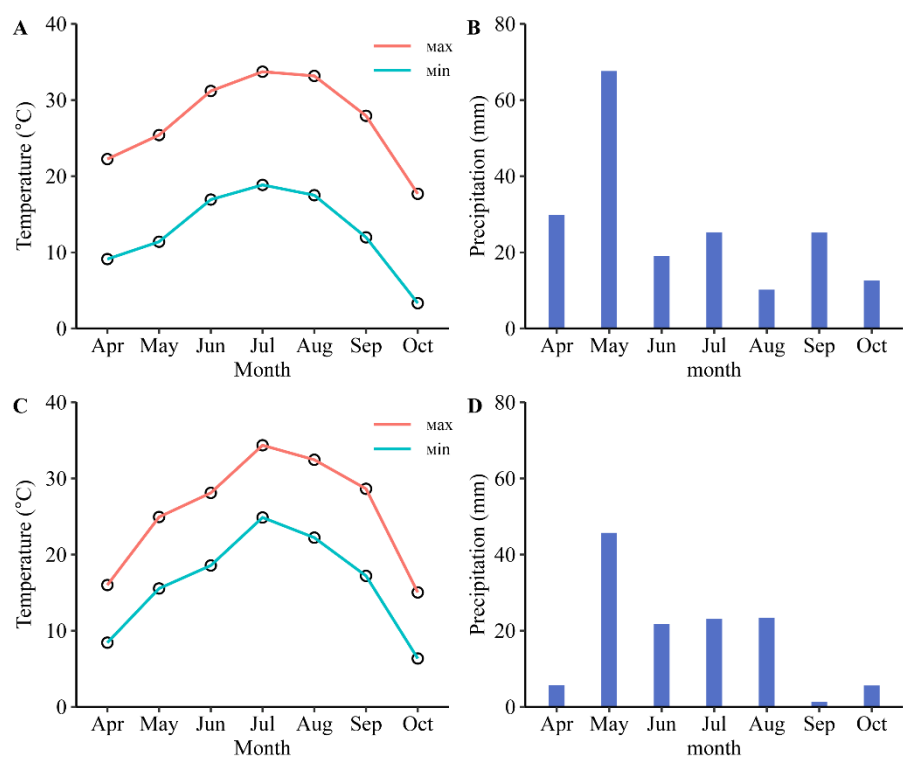

**Figure S9.** The temperature and precipitation changes of Shihezi, Xinjiang in 2019 and 2021 from sowing to harvesting of cotton. Notes: Weather data from April to October of 2019(A, B) and 2021(C, D) were collected from <https://www.worldweatheronline.com>.
