# Supplementary material for: Dissection of Hyperspectral Reflectance to Estimate Photosynthetic Characteristics in Upland Cotton (Gossypium hirsutum L.) under Different Nitrogen Fertilizer Application Based on Machine Learning Algorithms
Source: Plants (Basel). 2023 Jan 19;12(3):455. doi: 10.3390/plants12030455 (PMC9919998; doi:10.3390/plants12030455)
Supplement: Supplementary file 1 [file plants-12-00455-s001.zip › plants-1918524-Supplementary Tables.xlsx]

## Sheet:  Table S1
Supplementary Table S1. The soil typeand fertility of the two experimental fields
Test area	Soil type	pH value	Total nitrogen content (mg/kg)	Available phosphorus (mg/kg)	Available potassium (mg/kg)	Organic matter (g/kg)
Test 2019	gray desert soil	8.28	0.6	11.2	130.1	14.2
Test 2021	meadow soil	8.5	1.13	45.39	763	18.82

## Sheet:  Table S2
Supplementary Table S2. The summarization of fertilization with irrigation during the whole growth period in 2019
Growth stage	Times of dripping fertilization	Irrigation quantity (m3/hm2)	fertilization with irrigation date	Treatments fertilization capacity (kg/hm2)
				N0	N1	N2	N3
Emergence water	1	423	2022-04-25	Only dripping water but not fertilizing this time
Budding phase	1	423	2022-06-21	0	22.5	45	67.5
Full flowering phase	2	423	2022-06-29	0	30	60	90
		423	2022-07-08	0	30	60	90
Flowering and bolling phase	2	423	2022-07-17	0	22.5	45	67.5
		423	2022-07-26	0	22.5	45	67.5
Full boll-forming phase	2	423	2022-08-04	0	22.5	45	67.5
		423	2022-08-13	Only dripping water but not fertilizing this time
Opening boll phase	2	423	2022-08-21	Dripping water twice during this period, no fertilization
		423	2022-08-30
Total	10	4230		0	150	300	450

## Sheet:  Table S3
Supplementary Table S3. The summarization of fertilization with irrigation during the whole growth period in 2021
Growth stage	Times of dripping fertilization	Irrigation quantity (m3/hm2)	fertilization with irrigation date	Treatments fertilization capacity (kg/hm2)
				N0	N1	N2	N3
Emergence water	1	450	2022-04-25	Only dripping water but not fertilizing this time
Budding phase	3	450	2022-06-08	0	7.5	15	22.5
		600	2022-06-16	0	15	30	45
		450	2022-06-25	0	15	30	45
Full flowering phase	2	450	2022-02-07	0	30	60	90
		450	2022-07-10	0	30	60	90
Flowering and bolling phase	3	450	2022-07-18	0	30	60	90
		450	2022-07-26	0	15	30	45
		450	2022-08-05	0	7.5	15	22.5
Full boll-forming phase	2	300	2022-08-11	Dripping water twice during this period, no fertilization
		300	2022-08-19
Total	11	4800		0	150	300	450

## Sheet: Table S4
Supplementary Table S4. characteristics of two cotton varieties
Variety Name	Growth period (Days)	Cotton Architecture	Fruit Branch Type	Favorable Planting Region
Xinluzao61	121	Tower	Ⅱ	Precocious machine cotton picking area in northern Xinjiang
Xinluzao72	123	Tower	Ⅰ~Ⅱ	Suitable for northern Xinjiang cotton area and southern Xinjiang precocious cotton area.

## Sheet:  Table S5
Supplementary Table S5. Tuning hyperparameters in each machine learning algorithm
Algorithm	Tuning hyperparameters	Parameter space
		min	max
RF	number of trees	50	1000
	number of variables used to split the nodes	1	250
	the minimum number of unique cases in a terminal node	1	20
	maximum depth at which a tree should be grown	10	50
SVM	kernel bandwidth	0.1	10
	regularisation parameter	0	10
	kernel function	polynomial, radia
XGBoost	Step size shrinkage used in update to prevents overfitting	0.2	0.4
	Minimum sum of instance weight (hessian) needed in a child	1	20
	Subsample ratio of the training instances	0.7	0.8
	the subsample ratio of columns when constructing each tree	0.9	1
	the subsample ratio of columns for each level	0.5	0.7
	The number of rounds for boosting	1	25
LightGBM	shrinkage rate	0.05	0.2
	number of boosting iterations	100	1000
	max number of leaves in one tree	5	50
	limit the max depth for tree model	3	5
	minimal number of data in one leaf	1	100
